# Supplementary material
Source: PubMed Central journal article supplement (PMC1560031)
Supplement: rspb20053334s06.pdf [file rspb20053334s06.pdf]

| <b>Genus</b>            | <b>species</b>        | <b>male ornaments</b> | <b>sex chrom</b> | <b>ornament citation</b>                      | <b>sex chromosome citation</b> |
|-------------------------|-----------------------|-----------------------|------------------|-----------------------------------------------|--------------------------------|
| <i>Diademichthys</i>    | <i>lineatus</i>       | brighter              | XX-XO            | Breder and Rosen 1966                         | Devlin and Nagahama 2002       |
| <i>Galaxias</i>         | <i>platei</i>         | no                    | XX-XO            | Breder and Rosen 1966                         | Devlin and Nagahama 2002       |
| <i>Gobiodon</i>         | <i>citrinus</i>       | no                    | XX-XO            | Breder and Rosen 1966, Reeve and Pfennig 2003 | Chourrout 1986                 |
| <i>Lampanyctus</i>      | <i>ritteri</i>        | no                    | XX-XO            | Breder and Rosen 1966                         | Devlin and Nagahama 2002       |
| <i>Parvilux</i>         | <i>ingens</i>         | no                    | XX-XO            | Breder and Rosen 1966                         | Devlin and Nagahama 2002       |
| <i>Sternoptyx</i>       | <i>diaphana</i>       | no                    | XX-XO            | Paxton and Eschenmeyer 1998                   | Devlin and Nagahama 2002       |
| <i>Symphurus</i>        | <i>plagiusa</i>       | no                    | XX-XO            | Breder and Rosen 1966                         | Sola et al. 1982               |
| <i>Xiphophorus</i>      | <i>maculatus</i>      | dark dorsal           | XX'-XY           | Breder and Rosen 1966, Meyer 1997             | Bellamy 1928                   |
| <i>Acerina</i>          | <i>cernua</i>         | no                    | XX-XY            | Muus et al. 1999                              | Devlin and Nagahama 2002       |
| <i>Argentina</i>        | <i>silus</i>          | no                    | XX-XY            | Breder and Rosen 1966                         | Chourrout 1986                 |
| <i>Arothron</i>         | <i>nigropunctatus</i> | no                    | XX-XY            | Breder and Rosen 1966                         | Devlin and Nagahama 2002       |
| <i>Barbonymus</i>       | <i>gonionotus</i>     | no                    | XX-XY            | Froese and Pauly 2004                         | Pognthana et al. 1995          |
| <i>Barilius</i>         | <i>shacra</i>         | no                    | XX-XY            | Jayaram 1981                                  | Devlin and Nagahama 2002       |
| <i>Beryx</i>            | <i>splendens</i>      | no                    | XX-XY            | McEachran 1998                                | Devlin and Nagahama 2002       |
| <i>Bothus</i>           | <i>podas</i>          | longer fins           | XX-XY            | Breder and Rosen 1966                         | Devlin and Nagahama 2002       |
| <i>Brevoortia</i>       | <i>aurea</i>          | no                    | XX-XY            | Breder and Rosen 1966                         | Devlin and Nagahama 2002       |
| <i>Brienomyrus</i>      | <i>brachistius</i>    | electric song         | XX-XY            | Breder and Rosen 1966, Froese and Pauly 2004  | Devlin and Nagahama 2002       |
| <i>Carassius</i>        | <i>auratus</i>        | tubercles             | XX-XY            | Froese and Pauly 2004                         | Yamamoto and Kajimisha 1969    |
| <i>Carassius</i>        | <i>carassius</i>      | no                    | XX-XY            | Jayaram 1981                                  | Devlin and Nagahama 2002       |
| <i>Cichlasoma</i>       | <i>nigofasciata</i>   | long rays, dark bars  | XX-XY            | Reeve and Pfennig 2003                        | Reeve and Pfennig 2003         |
| <i>Clarias</i>          | <i>fuscus</i>         | no                    | XX-XY            | Breder and Rosen 1966                         | Devlin and Nagahama 2002       |
| <i>Clarias</i>          | <i>gariopinus</i>     | no                    | XX-XY            | Breder and Rosen 1966                         | Galbusera et al. 2000          |
| <i>Coregonus</i>        | <i>sardinella</i>     | no                    | XX-XY            | Breder and Rosen 1966, Reeve and Pfennig 2003 | Devlin and Nagahama 2002       |
| <i>Ctenopharyngodon</i> | <i>idella</i>         | no                    | XX-XY            | Sanford 1995                                  | Stanley 1976                   |
| <i>Cyprinus</i>         | <i>carpio</i>         | no                    | XX-XY            | Gilbert and Williams 2002                     | Golovinskaya 1972              |
| <i>Dormitator</i>       | <i>maculatus</i>      | brighter              | XX-XY            | Froese and Pauly 2004                         | Moreira-Filho et al. 1993      |
| <i>Eigenmannia</i>      | <i>virescens</i>      | electric song         | XX-XY            | Froese and Pauly 2004                         | Devlin and Nagahama 2002       |
| <i>Fundulus</i>         | <i>diaphanus</i>      | no                    | XX-XY            | Goldstein et al.2000                          | Chourrout 1986                 |
| <i>Fundulus</i>         | <i>heteroclitus</i>   | brighter stripes      | XX-XY            | Robins and Ray 1986                           | Kornfield 1981                 |
| <i>Fundulus</i>         | <i>parvipinnis</i>    | male darker           | XX-XY            | Goldstein et al.2000                          | Chourrout 1986                 |
| <i>Gasterosteus</i>     | <i>wheatlandi</i>     | brighter              | XX-XY            | Breder and Rosen 1966                         | Devlin and Nagahama 2002       |
| <i>Geophagus</i>        | <i>brasiliensis</i>   | no                    | XX-XY            | Sanford 1995                                  | Chourrout 1986                 |
| <i>Gobionellus</i>      | <i>shufeldti</i>      | no                    | XX-XY            | Robins and Ray 1986                           | Devlin and Nagahama 2002       |
| <i>Gobius</i>           | <i>bucchichi</i>      | no                    | XX-XY            | Miller and Loates 1997                        | Devlin and Nagahama 2002       |
| <i>Gobius</i>           | <i>cobitis</i>        | darker                | XX-XY            | Miller and Loates 1997                        | Devlin and Nagahama 2002       |
| <i>Gobius</i>           | <i>niger</i>          | no                    | XX-XY            | Muus et al. 1999                              | Chourrout 1986                 |
| <i>Gobius</i>           | <i>pagenellis</i>     | no                    | XX-XY            | Muus et al. 1999                              | Chourrout 1986                 |
| <i>Gymnothorax</i>      | <i>eurostus</i>       | no                    | XX-XY            | Breder and Rosen 1966                         | Devlin and Nagahama 2002       |
| <i>Hucho</i>            | <i>hucho</i>          | red color             | XX-XY            | Miller and Loates 1997                        | Devlin and Nagahama 2002       |
| <i>Hypostomus</i>       | <i>ancistroides</i>   | no                    | XX-XY            | Breder and Rosen 1966                         | Moreira-Filho et al. 1993      |
| <i>Hypostomus</i>       | <i>macrops</i>        | no                    | XX-XY            | Breder and Rosen 1966                         | Moreira-Filho et al. 1993      |

|                          |                       |                       |       |                                   |                           |
|--------------------------|-----------------------|-----------------------|-------|-----------------------------------|---------------------------|
| <i>Lepidogaster</i>      | <i>candollei</i>      | brighter              | XX-XY | Breder and Rosen 1966             | Devlin and Nagahama 2002  |
| <i>Leporinus</i>         | <i>lacustris</i>      | brighter, longer fins | XX-XY | Breder and Rosen 1966             | Moreira-Filho et al. 1993 |
| <i>Mastacembelus</i>     | <i>aculeatus</i>      | no                    | XX-XY | Breder and Rosen 1966             | Liu et al. 2002           |
| <i>Melamphaes</i>        | <i>parvus</i>         | no                    | XX-XY | Breder and Rosen 1966             | Devlin and Nagahama 2002  |
| <i>Microchirus</i>       | <i>ocellatus</i>      | longer fins           | XX-XY | Breder and Rosen 1966             | Devlin and Nagahama 2002  |
| <i>Netuma</i>            | <i>barba</i>          | no                    | XX-XY | Breder and Rosen 1966             | Devlin and Nagahama 2002  |
| <i>Nothobranchius</i>    | <i>guentheri</i>      | no                    | XX-XY | Breder and Rosen 1966             | Devlin and Nagahama 2002  |
| <i>Noturus</i>           | <i>taylori</i>        | no                    | XX-XY | Breder and Rosen 1966             | Devlin and Nagahama 2002  |
| <i>Odonus</i>            | <i>niger</i>          | no                    | XX-XY | Sanford 1995                      | Devlin and Nagahama 2002  |
| <i>Ompok</i>             | <i>bimaculatus</i>    | no                    | XX-XY | Breder and Rosen 1966             | Sola et al. 1981          |
| <i>Oncorhynchus</i>      | <i>gorbuscha</i>      | hooked jaw, brighter  | XX-XY | Breder and Rosen 1966             | Chourrout 1986            |
| <i>Oncorhynchus</i>      | <i>kisutch</i>        | hooked jaw, brighter  | XX-XY | Breder and Rosen 1966             | Chourrout 1986            |
| <i>Oncorhynchus</i>      | <i>lagocephalus</i>   | hooked jaw, brighter  | XX-XY | Breder and Rosen 1966             | Chourrout 1986            |
| <i>Oncorhynchus</i>      | <i>mykiss</i>         | hooked jaw, brighter  | XX-XY | Breder and Rosen 1966             | Chourrout 1986            |
| <i>Oncorhynchus</i>      | <i>tshawytscha</i>    | hooked jaw, brighter  | XX-XY | Breder and Rosen 1966             | Devlin and Nagahama 2002  |
| <i>Oreochromis</i>       | <i>mossambicus</i>    | brighter              | XX-XY | Froese and Pauly 2004             | Chourrout 1986            |
| <i>Oryzias</i>           | <i>curvinotus</i>     | no                    | XX-XY | Breder and Rosen 1966             | Matsuda et al. 2003       |
| <i>Osteoglossum</i>      | <i>bicirrhosum</i>    | no                    | XX-XY | Breder and Rosen 1966             | Devlin and Nagahama 2002  |
| <i>Parapercis</i>        | <i>sexfasciata</i>    | no                    | XX-XY | Andryashev 1971                   | Devlin and Nagahama 2002  |
| <i>Pimelodella</i>       | <i>sp.</i>            | no                    | XX-XY | Breder and Rosen 1966             | Moreira-Filho et al. 1993 |
| <i>Plecostomus</i>       | <i>ancistroides</i>   | no                    | XX-XY | Breder and Rosen 1966             | Chourrout 1986            |
| <i>Plecostomus</i>       | <i>macrops</i>        | no                    | XX-XY | Breder and Rosen 1966             | Devlin and Nagahama 2002  |
| <i>Proterorhinus</i>     | <i>marmoratus</i>     | no                    | XX-XY | Miller and Loates 1997            | Devlin and Nagahama 2002  |
| <i>Pseudocrenilabrus</i> | <i>multicolor</i>     | brighter              | XX-XY | Froese and Pauly 2004             | Chourrout 1986            |
| <i>Pseudotocinclus</i>   | <i>tietensis</i>      | no                    | XX-XY | Breder and Rosen 1966             | Moreira-Filho et al. 1993 |
| <i>Pterolebias</i>       | <i>hoignei</i>        | no                    | XX-XY | Breder and Rosen 1966             | Devlin and Nagahama 2002  |
| <i>Rhinecanthus</i>      | <i>aculeatus</i>      | no                    | XX-XY | Smith and Heemstra 1986           | Devlin and Nagahama 2002  |
| <i>Rhinecanthus</i>      | <i>reticulangus</i>   | no                    | XX-XY | Smith and Heemstra 1986           | Devlin and Nagahama 2002  |
| <i>Salmo</i>             | <i>salar</i>          | hooked jaw, brighter  | XX-XY | Froese and Pauly 2004             | Woram et al. 2003         |
| <i>Salmo</i>             | <i>trutta</i>         | hooked jaw, brighter  | XX-XY | Froese and Pauly 2004             | Chourrout 1986            |
| <i>Salvelinus</i>        | <i>alpinus</i>        | brighter              | XX-XY | Froese and Pauly 2004             | Woram et al. 2003         |
| <i>Salvelinus</i>        | <i>namaycush</i>      | brighter              | XX-XY | Froese and Pauly 2004             | Devlin and Nagahama 2002  |
| <i>Scopelengys</i>       | <i>tristis</i>        | no                    | XX-XY | Breder and Rosen 1966             | Devlin and Nagahama 2002  |
| <i>Scopeloberyx</i>      | <i>robustus</i>       | no                    | XX-XY | Breder and Rosen 1966             | Devlin and Nagahama 2002  |
| <i>Scopelogadus</i>      | <i>mizolepis</i>      | no                    | XX-XY | Breder and Rosen 1966             | Devlin and Nagahama 2002  |
| <i>Stenobranchius</i>    | <i>leucopsarus</i>    | no                    | XX-XY | Breder and Rosen 1966             | Chourrout 1986            |
| <i>Stephenolepis</i>     | <i>cirrifer</i>       | no                    | XX-XY | Smith 1997                        | Devlin and Nagahama 2002  |
| <i>Symbolophorus</i>     | <i>californiensis</i> | no                    | XX-XY | Breder and Rosen 1966             | Devlin and Nagahama 2002  |
| <i>Vimba</i>             | <i>vimba</i>          | brighter              | XX-XY | Miller and Loates 1997            | Devlin and Nagahama 2002  |
| <i>Xiphophorus</i>       | <i>cortezi</i>        | sword, dark caudal    | XX-XY | Breder and Rosen 1966, Meyer 1997 | Voff and Scharlt 2001     |
| <i>Xiphophorus</i>       | <i>pygmaeus</i>       | sword, dark caudal    | XX-XY | Breder and Rosen 1966, Meyer 1997 | Kallman and Atz 1966      |
| <i>Xiphophorus</i>       | <i>variatus</i>       | no                    | XX-XY | Breder and Rosen 1966, Meyer 1997 | Kallman and Atz 1966      |

|                            |                       |                       |       |                                                |                           |
|----------------------------|-----------------------|-----------------------|-------|------------------------------------------------|---------------------------|
| <i>Xiphophorus</i>         | <i>xiphidium</i>      | sword                 | XX-XY | Breder and Rosen 1966, Meyer 1997              | Volff and Schartl 2001    |
| <i>Zeus</i>                | <i>faber</i>          | no                    | XX-XY | Breder and Rosen 1966                          | Devlin and Nagahama 2002  |
| <i>Chaenodraco</i>         | <i>wilsoni</i>        | no                    | XX-XY | Froese and Pauly 2004                          | Devlin and Nagahama 2002  |
| <i>Garmanella</i>          | <i>pulchra</i>        | no                    | XX-XY | Goldstein et al.2000                           | Devlin and Nagahama 2002  |
| <i>Megupsilon</i>          | <i>aporus</i>         | brighter              | XX-XY | Goldstein et al.2000                           | Devlin and Nagahama 2002  |
| <i>Oryzias</i>             | <i>latipes</i>        | no                    | XX-XY | Breder and Rosen 1966                          | Francis 1992              |
| <i>Parablennius</i>        | <i>tentacularis</i>   | brighter              | XX-XY | Breder and Rosen 1966                          | Devlin and Nagahama 2002  |
| <i>Poecilia</i>            | <i>reticulata</i>     | brighter, longer fins | XX-XY | Breder and Rosen 1966, Reeve and Pfennig 2003  | Francis 1992              |
| <i>Scolecenchelys</i>      | <i>gymnotus</i>       | no                    | XX-XY | Breder and Rosen 1966                          | Devlin and Nagahama 2002  |
| <i>Stephenolepis</i>       | <i>hispidus</i>       | no                    | XX-XY | Gilbert and Williams 2002                      | Devlin and Nagahama 2002  |
| <i>Xiphophorus</i>         | <i>milleri</i>        | no                    | XX-XY | Breder and Rosen 1966, Meyer 1997              | Kallman and Atz 1966      |
| <i>Xiphophorus</i>         | <i>nezahualcoyotl</i> | sword, dark caudal    | XX-XY | Breder and Rosen 1966, Meyer 1997              | Volff and Schartl 2001    |
| <i>Xiphophorus</i>         | <i>nigrens</i>        | sword                 | XX-XY | Breder and Rosen 1966, Meyer 1997              | Volff and Schartl 2001    |
| <i>Cynoglossus</i>         | <i>puncticeps</i>     | no                    | ZZ-ZO | Breder and Rosen 1966                          | Devlin and Nagahama 2002  |
| <i>Acipenser</i>           | <i>transmontanus</i>  | brighter              | ZZ-ZW | Breder and Rosen 1966                          | VanEenennaam et al. 1999  |
| <i>Alepes</i>              | <i>djedaba</i>        | no                    | ZZ-ZW | Kyushin et al. 1982                            | Devlin and Nagahama 2002  |
| <i>Anguilla</i>            | <i>anguilla</i>       | no                    | ZZ-ZW | Breder and Rosen 1966                          | Chourrout 1986            |
| <i>Anguilla</i>            | <i>japonica</i>       | no                    | ZZ-ZW | Breder and Rosen 1966                          | Chourrout 1986            |
| <i>Anguilla</i>            | <i>rostrata</i>       | no                    | ZZ-ZW | Breder and Rosen 1966                          | Chourrout 1986            |
| <i>Apeltes</i>             | <i>quadracus</i>      | brighter              | ZZ-ZW | Breder and Rosen 1966                          | Chourrout 1986            |
| <i>Aplocheilichthys</i>    | <i>panchax</i>        | no                    | ZZ-ZW | Breder and Rosen 1966                          | Devlin and Nagahama 2002  |
| <i>Aulopus</i>             | <i>japonicus</i>      | brighter              | ZZ-ZW | Froese and Pauly 2004                          | Devlin and Nagahama 2002  |
| <i>Boleophthalmus</i>      | <i>boddaerti</i>      | no                    | ZZ-ZW | Jayaram 1981                                   | Devlin and Nagahama 2002  |
| <i>Characidium</i>         | <i>fasciatum</i>      | spotted dorsal        | ZZ-ZW | Sanford 1995                                   | Devlin and Nagahama 2002  |
| <i>Clarias</i>             | <i>batrachus</i>      | no                    | ZZ-ZW | Breder and Rosen 1966                          | Pandey and Lakra 1997     |
| <i>Conger</i>              | <i>myriaster</i>      | no                    | ZZ-ZW | Breder and Rosen 1966                          | Chourrout 1986            |
| <i>Eleotris</i>            | <i>pisonis</i>        | no                    | ZZ-ZW | Breder and Rosen 1966                          | Devlin and Nagahama 2002  |
| <i>Gambusia</i>            | <i>affinis</i>        | no                    | ZZ-ZW | Breder and Rosen 1966, Reeve and Pfennig 2003, | Sola et al. 1981          |
| <i>Gambusia</i>            | <i>hurtadoi</i>       | no                    | ZZ-ZW | Breder and Rosen 1966, Froese and Pauly 2004   | Chourrout 1986            |
| <i>Gambusia</i>            | <i>puncticulata</i>   | no                    | ZZ-ZW | Breder and Rosen 1966, Froese and Pauly 2004   | Moreira-Filho et al. 1993 |
| <i>Hemisynodontis</i>      | <i>membranaceous</i>  | no                    | ZZ-ZW | Breder and Rosen 1966                          | Devlin and Nagahama 2002  |
| <i>Hypostomus</i>          | <i>sp.</i>            | no                    | ZZ-ZW | Breder and Rosen 1966                          | Artoni et al. 1998        |
| <i>Ictalurus</i>           | <i>punctatus</i>      | no                    | ZZ-ZW | Breder and Rosen 1966                          | Wolters, et al 1882       |
| <i>Imparfinis</i>          | <i>mirini</i>         | no                    | ZZ-ZW | Breder and Rosen 1966                          | Devlin and Nagahama 2002  |
| <i>Lepidocephalichthys</i> | <i>guntea</i>         | brighter              | ZZ-ZW | Breder and Rosen 1966                          | Devlin and Nagahama 2002  |
| <i>Leporinus</i>           | <i>conirostris</i>    | brighter, longer fins | ZZ-ZW | Breder and Rosen 1966                          | Moreira-Filho et al. 1993 |
| <i>Leporinus</i>           | <i>elongatus</i>      | brighter, longer fins | ZZ-ZW | Breder and Rosen 1966                          | Moreira-Filho et al. 1993 |
| <i>Leporinus</i>           | <i>macrocephalus</i>  | brighter, longer fins | ZZ-ZW | Breder and Rosen 1966                          | Moreira-Filho et al. 1993 |
| <i>Leporinus</i>           | <i>obtusidens</i>     | brighter, longer fins | ZZ-ZW | Breder and Rosen 1966                          | Moreira-Filho et al. 1993 |
| <i>Leporinus</i>           | <i>reinhardti</i>     | brighter, longer fins | ZZ-ZW | Breder and Rosen 1966                          | Moreira-Filho et al. 1993 |
| <i>Leporinus</i>           | <i>silvestrii</i>     | brighter, longer fins | ZZ-ZW | Breder and Rosen 1966                          | Devlin and Nagahama 2002  |
| <i>Leporinus</i>           | <i>trifasciatus</i>   | brighter, longer fins | ZZ-ZW | Breder and Rosen 1966                          | Moreira-Filho et al. 1993 |

|                          |                         |                        |       |                                               |                           |
|--------------------------|-------------------------|------------------------|-------|-----------------------------------------------|---------------------------|
| <i>Leuciscus</i>         | <i>carolitertii</i>     | no                     | ZZ-ZW | Miller and Loates 1997                        | Devlin and Nagahama 2002  |
| <i>Leuciscus</i>         | <i>pyrenaicus</i>       | no                     | ZZ-ZW | Miller and Loates 1997                        | Devlin and Nagahama 2002  |
| <i>Loricariichthys</i>   | <i>platymetopon</i>     | no                     | ZZ-ZW | Breder and Rosen 1966                         | Devlin and Nagahama 2002  |
| <i>Microlepidogaster</i> | <i>leucofrenatus</i>    | no                     | ZZ-ZW | Breder and Rosen 1966                         | Moreira-Filho et al. 1993 |
| <i>Mollienesia</i>       | <i>sphenops</i>         | no                     | ZZ-ZW | Breder and Rosen 1966, Froese and Pauly 2004  | Chourrout 1986            |
| <i>Oreochromis</i>       | <i>aureus</i>           | brighter               | ZZ-ZW | Froese and Pauly 2004                         | Chourrout 1986            |
| <i>Poecilia</i>          | <i>latipinna</i>        | brighter, large dorsal | ZZ-ZW | Breder and Rosen 1966, Reeve and Pfennig 2003 | Devlin and Nagahama 2002  |
| <i>Poecilia</i>          | <i>sphenops</i>         | larger dorsal          | ZZ-ZW | Breder and Rosen 1966, Reeve and Pfennig 2003 | Devlin and Nagahama 2002  |
| <i>Poecilia</i>          | <i>velifera</i>         | larger dorsal          | ZZ-ZW | Breder and Rosen 1966, Froese and Pauly 2004  | Devlin and Nagahama 2002  |
| <i>Saurida</i>           | <i>elongata</i>         | no                     | ZZ-ZW | Breder and Rosen 1966                         | Chourrout 1986            |
| <i>Saurida</i>           | <i>undosquamis</i>      | no                     | ZZ-ZW | Breder and Rosen 1966                         | Sola et al. 1982          |
| <i>Scardinius</i>        | <i>erythrophthalmus</i> | no                     | ZZ-ZW | Reeve and Pfennig 2003                        | Koehler et al. 1995       |
| <i>Semaprochilodus</i>   | <i>taeniurus</i>        | no                     | ZZ-ZW | Sanford 1995                                  | Devlin and Nagahama 2002  |
| <i>Synodontis</i>        | <i>bastiani</i>         | no                     | ZZ-ZW | Breder and Rosen 1966                         | Devlin and Nagahama 2002  |
| <i>Synodontis</i>        | <i>budgetti</i>         | no                     | ZZ-ZW | Breder and Rosen 1966                         | Devlin and Nagahama 2002  |
| <i>Synodontis</i>        | <i>courteti</i>         | no                     | ZZ-ZW | Breder and Rosen 1966                         | Devlin and Nagahama 2002  |
| <i>Synodontis</i>        | <i>filamentosus</i>     | no                     | ZZ-ZW | Breder and Rosen 1966                         | Devlin and Nagahama 2002  |
| <i>Synodontis</i>        | <i>ocellifer</i>        | no                     | ZZ-ZW | Breder and Rosen 1966                         | Devlin and Nagahama 2002  |
| <i>Synodontis</i>        | <i>schall</i>           | no                     | ZZ-ZW | Breder and Rosen 1966                         | Devlin and Nagahama 2002  |
| <i>Synodontis</i>        | <i>sorex</i>            | no                     | ZZ-ZW | Breder and Rosen 1966                         | Devlin and Nagahama 2002  |
| <i>Synodontis</i>        | <i>violaceus</i>        | no                     | ZZ-ZW | Breder and Rosen 1966                         | Devlin and Nagahama 2002  |
| <i>Synodus</i>           | <i>hoshinonus</i>       | no                     | ZZ-ZW | Breder and Rosen 1966                         | Devlin and Nagahama 2002  |
| <i>Synodus</i>           | <i>ulae</i>             | no                     | ZZ-ZW | Breder and Rosen 1966                         | Devlin and Nagahama 2002  |
| <i>Thoracocharax</i>     | <i>stellatus</i>        | no                     | ZZ-ZW | Breder and Rosen 1966                         | Carvalho et al. 2002      |
| <i>Trachinotus</i>       | <i>ovatus</i>           | no                     | ZZ-ZW | Muus et al. 1999                              | Devlin and Nagahama 2002  |
| <i>Triportheus</i>       | <i>albus</i>            | no                     | ZZ-ZW | Axelrod and Schulz 1983                       | Moreira-Filho et al. 1993 |
| <i>Triportheus</i>       | <i>angulatus</i>        | no                     | ZZ-ZW | Paysan 1975                                   | Moreira-Filho et al. 1993 |
| <i>Xiphophorus</i>       | <i>alvarezi</i>         | sword, dark caudal     | ZZ-ZW | Breder and Rosen 1966, Meyer 1997             | Volff and Schartl 2001    |
| <i>Trachinocephalus</i>  | <i>myops</i>            | no                     | ZZ-ZW | Breder and Rosen 1966                         | Devlin and Nagahama 2002  |

- Andryashev, A. P. 1971 *Fishes of the Sea of Japan and the Adjacent Areas of the Sea of Okhotsk and the Yellow Sea*. Jerusalem: Israel Program for Scientific Translations.
- Artoni, R. F., Venere, P. C. & Bertollo, L. A. C. 1998 A heteromorphic ZZ-ZW sex chromosome system in fish, genus *Hypostomus* (Loricariidae). *Cytologia* **63**, 421-425.
- Axelrod, H. R. & Schultz, L. P. 1983 *Handbook of Tropical Aquarium Fishes*. Neptune City: T.F.H. Publications.
- Bellamy, A. W. 1928 Sex-linked inheritance of the teleost *Platypoecilus maculatus*. *Genetics* **13**, 226-232.
- Breder, C. M. & Rosen, D. E. 1966 *Modes of Reproduction in Fishes*. Garden City, NY: Natural History Press.
- Carvalho, M. L., Oliveira, C. & Foresti, F. 2002 Description of a ZZ/ZW sex chromosome system in *Theoacocharax cf. stellatus* (Teleostei, Characiformes, Gasteropelecidae). *Genetics and Molecular Biology* **25**, 299-303.
- Chourrout, D. 1986 Revue sur le déterminisme génétique du sexe des poissons téléostéens. *Bulletin de la Société Zoologique de France* **113**, 123-144.
- Devlin, R. H. & Nagahama, Y. 2002 Sex determination and sex differentiation in fish: an overview of genetic, physiological, and environmental influences. *Aquaculture* **208**, 191-364.
- Francis, R. C. 1992 Sexual lability in teleosts: developmental factors. *The Quarterly Review of Biology* **67**, 1-18.
- Froese, R. & Pauly, D. 2004 Fishbase. www.fishbase.org.
- Galbusera, P., Volckaert, F. A. M. & Ollevier, F. 2000 Gynogenesis in the African catfish *Clarias gariepinus* (Burchell 18122) III. Induction of endomitosis and the presence of residual genetic variation. *Aquaculture* **185**, 25-42.
- Gilbert, C. R. & Williams, J. D. 2002 *National Audubon Society Field Guide to Fishes*. New York: Alfred A. Knopf.
- Goldstein, R. J., Harper, R. W. & Edwards, R. 2000 *American Aquarium Fishes*. College Station: Texas A & M Press.
- Golovinskaya, K. A. 1972. In *Genetics, selection, and hybridization of fish* (ed. C. B.I.). Jerusalem: Isreal program for Scientific Translations.
- Jayaram, K. C. 1981 *Freshwater Fishes of India, Pakistan, Bangladesh, Burma, and Sri Lanka- A Handbook*. Calcutta: Zoological Survey of India.
- Kallman, K. D. & Atz, J. W. 1966 Gene and chromosome homology in fishes of genus *Xiphophorus*. *Zoologica* **51**, 107-135.
- Koehler, M. R., Neuhaus, D., Engel, W., Schartl, M. & Schmid, M. 1995 Evidence for an unusual ZW/ZW/ZZ sex-chromosome system in *Scardinius erythrophthalmus* (Pisces, Cyprinidae), as detected by cytogenetic and H-Y antigen analysis. *Cytogenetics and Cell Genetics* **71**, 356-362.
- Kornfield, I. 1981 Distribution of constitutive heterochromatin and the evolution of sex chromosomes in *Fundulus*. *Copeia* **1981**, 916-918.
- Kyushin, K., Amaoka, K., Nakaya, K., Ida, H., Tanino, Y. & T., S. 1982 *Fishes of the South China Sea*. Hokkaido: Japan Marine Fishery Research Center.
- Liu, J. D., Yi, M. S., Zhao, G., Zhou, F., Wang, D. Q. & Yu, Q. X. 2002 Sex chromosomes in the spiny eel (*Masacembelus aculeatus*) revealed by mitotic and meiotic analysis. *Cytogenetic and Genome Research* **98**, 291-297.
- Matsuda, M., Sato, T., Toyazaki, Y., Nagahama, Y., Hamaguchi, S. & Sakaizumi, M. 2003 *Oryzias curvinotus* has DMY, a gene that is required for male development in medaka, *O. latipes*. *Zoological Science* **20**, 159-161.
- McEachran, J. D. & Feckhelm, J. D. 1998 *Fishes of the Gulf of Mexico*. Austin: University of Texas Press.
- Meyer, A. 1997 The evolution of sexually selected traits in male swordtail fishes (Xiphophorus: Poeciliidae). *Heredity* **79**, 329-337.
- Miller, P. J. & Loates, M. J. 1997 *Fish of Britain and Europe*. London: Harper Collins.
- Moreira-Filho, O., Bertollo, L. A. C. & Galetti, P. M. 1993 Distribution of sex chromosome mechanisms in neotropical fish and description of a ZZ/ZW system in *Parodon hilarii* (Parodontidae). *Caryologia* **46**, 115-125.
- Muus, B. J., Nielsen, J. G., Dahlstrom, P. & Nystrom, B. O. 1999 *Sea Fish*. Hedehusen: Scandanavian Fishing Year Book.
- Pandey, N. & Lakra, W. S. 1997 Evidence for female heterogamety, B-Chromosome and natural tetraploidy in the Asian catfish, *Clarias batrachus*, used in aquaculture. *Aquaculture* **149**, 31-37.

- Paxton, J. R., Eschenmeyer, W.N. 1998 *Encyclopedia of fishes*. San Diego: Academic Press
- Paysan, K. 1975 *Guide to aquarium fishes*. New York: Harper and Row.
- Pongthana, N., Ppenman, D. J., Karnasuta, J. & McAndrew, B. J. 1995 Induced gynogenesis in the silver barb (*Puntius gonionotus* Bleeker) and evidence for female homogamety. *Aquaculture* **135**, 267-276.
- Reeve, H. K. & Pfennig, D. W. 2003 Genetic biases for showy males: are some genetic systems especially conducive to sexual selection? *Proceedings of the National Academy of Sciences, U.S.A.* **100**, 1089-1094.
- Robins, C. R. & Ray, G. C. 1986 *A Field Guide to Atlantic Coast Fishes*. Boston: Houghton Mifflin.
- Sanford, G. 1995 *An Illustrated Encyclopedia of Aquarium Fishes*. London: Quintet.
- Smith, C. L. 1997 *National Audubon Society Field Guide to Tropical Marine Fishes*. New York: Alfred A. Knopf.
- Smith, M. M. & Heemstra, P. C. 1986 *Smiths Sea Fishes*. New York: Springer-Verlag.
- Sola, L., Cataudella, S. & Capanna, E. 1981 New developments in vertebrate cytotaxonomy. III. Karyology of bony fishes: a review. *Genetica* **54**.
- Stanley, J. G. 1976 Female homogamete in grass carp (*Ctenopharyngodon idela*) determined by gynogenesis. *Journal of the Fisheries Research Board of Canada* **33**, 1372-1374.
- Van Eenennaam, A. L., Van Eenennaam, J. P., Medrano, J. F. & Doroshov, S. I. 1999 Evidence of female heterogametic sex determination in white sturgeon. *Journal of Heredity* **90**, 231-233.
- Volff, J.-N. & Schartl, M. 2001 Variability of genetic sex determination in poeciliid fishes. *Genetica* **111**, 101-110.
- Wolters, W. R., Libey, G. S. & Chrisman, C. L. 1982 Effect of triploidy on the growth and gonad development of channel catfish. *Transactions of the American Fisheries Society* **111**, 102-105.
- Woram, R. A., Gharbi, K., Sakamoto, T., Hoyheim, B., Holm, L.-E., Naish, K., McGowan, C., Ferguson, M. M., Phillips, R. B., Stein, J., Guyomard, R., Cairney, M., Taggart, J. B., Powell, R., Davidson, W. & Danzmann, R. G. 2003 Comparative genome analysis of the primary sex-determining locus in salmonid fishes. *Genome Research* **13**, 272-280.
- Yamamoto, T. & Kajishima, T. 1969 Sex-hormonic induction of reversal of sex differentiation in the goldfish and evidence for its male heterogamety. *Journal of Experimental Zoology* **168**, 215-222.
